# Supplementary material for: Association of VEGFA polymorphisms with susceptibility and clinical outcome of hepatocellular carcinoma in a Chinese Han population
Source: PubMed Central journal article supplement (PMC5369979; doi:10.18632/oncotarget.14870), 2017-01-27
Supplement: oncotarget-08-16488-s001.pdf [file oncotarget-08-16488-s001.pdf]

## Association of VEGFA polymorphisms with susceptibility and clinical outcome of hepatocellular carcinoma in a Chinese Han population

### Supplementary Materials

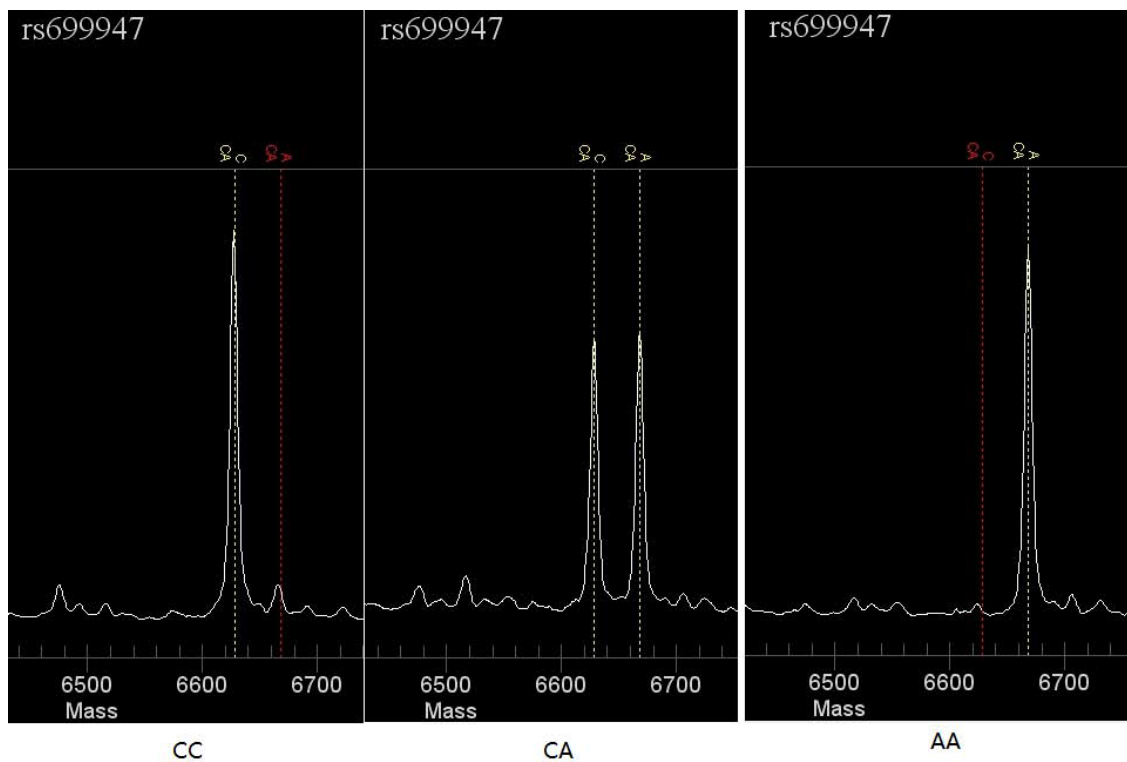

**Supplementary Figure 1: Genotyping of VEGF 2578C/A polymorphism by MALDI-TOF.** The horizontal axis represents the mass and the vertical axis represents the signal intensity. Around the 6600–6700 dalton in the horizontal axis, two lines (the C allele and the A allele) can be observed. If only a wave crest appeared at the C line, the genotype of this patient was CC (the left one); if only a wave crest appeared at the A line, the genotype of this patient was AA (the right one); if two wave crest appeared at both the C line and the A line, the genotype of this patient was CA (the middle one).

**Supplementary Table 1: Primers for PCR and single base extension for genotyping VEGF polymorphisms**

| Polymorphism         | Primers for PCR                                                      | Single base extension primers |
|----------------------|----------------------------------------------------------------------|-------------------------------|
| 936 C/T<br>Rs3025039 | F:ACGTTGGATGAGACTCCGGCGGAAGCATT<br>R:ACGTTGGATGATGGCGAATCCAATTCCAAG  | CGGGCGGGTGACCCAGCA            |
| 634G/C<br>Rs2010963  | F:ACGTTGGATGAGAGAGAGCGCGCGGGCGT<br>R:ACGTTGGATGTCCGGCGGTCACCCCCAAAA  | TGCGAGCAGCGAAAG               |
| 1612G/A<br>Rs10434   | F:ACGTTGGATGCCTTCGCTTACTCTCACCTG<br>R:ACGTTGGATGTTCTCTTCGCCGGGACATCT | CTGAGTTGCCCAGGAG              |
| 2578C/A<br>Rs699947  | F:ACGTTGGATGTTCTCAGTCCATGCCTCCAC<br>R:ACGTTGGATGAGTCAGTCTGATTATCCACC | GTCTGATTATCCACCCAGATC         |

**Supplementary Table 2: The detailed process for SNP genotyping. See Supplementary\_Table\_2**

**Supplementary Table 3: Frequency distribution of baseline characteristics among HCC patients and controls**

| Variable                         | HCC<br>(n = 476) | controls<br>(n = 526) | OR (95% CI)        | P-value |
|----------------------------------|------------------|-----------------------|--------------------|---------|
| Age [n (%)]                      |                  |                       |                    | 0.372   |
| < 55 years                       | 270 (56.7)       | 313 (59.5)            | 1.00               |         |
| ≥55 years                        | 206 (43.3)       | 213 (40.5)            | 1.12 (0.87,1.44)   |         |
| Gender [n (%)]                   |                  |                       |                    | 0.839   |
| Female                           | 124 (26.1)       | 140 (26.6)            | 1.00               |         |
| Male                             | 352 (73.9)       | 386 (73.4)            | 1.03 (0.78,1.36)   |         |
| Smoking status [n (%)]           |                  |                       |                    | < 0.001 |
| Never                            | 220 (46.2)       | 348 (66.2)            | 1.00               |         |
| Ever                             | 256 (53.8)       | 178 (33.8)            | 2.28 (1.76,2.94)   |         |
| Drinking status [n (%)]          |                  |                       |                    | 0.153   |
| Never                            | 346 (72.7)       | 403 (76.6)            | 1.00               |         |
| Ever                             | 130 (27.3)       | 123 (23.4)            | 1.23 (0.93,1.64)   |         |
| HBV carrier state [n (%)]        |                  |                       |                    | < 0.001 |
| HbsAg (-)                        | 154 (32.4)       | 441 (83.8)            | 1.00               |         |
| HbsAg (+)                        | 322 (67.6)       | 85 (16.2)             | 10.85 (8.03,14.66) |         |
| Family history of cancer [n (%)] |                  |                       |                    | 0.777   |
| No                               | 431 (90.5)       | 479 (91.1)            | 1.00               |         |
| Yes                              | 45 (9.5)         | 47 (8.9)              | 1.06 (0.69,1.63)   |         |

**Supplementary Table 4: Clinicopathologic characteristics of the enrolled patients with HCC**

| <b>Child-Pugh class <i>n</i> (%)</b>        |            |
|---------------------------------------------|------------|
| CH/A                                        | 366 (76.9) |
| B                                           | 79 (16.6)  |
| C                                           | 31 (6.5)   |
| Tumor size <i>n</i> (%)                     |            |
| ≤ 5 cm                                      | 240 (50.4) |
| > 5 cm                                      | 236 (49.6) |
| Tumor type, <i>n</i> (%)                    |            |
| Single                                      | 291 (61.1) |
| Multiple                                    | 117 (24.6) |
| Diffuse                                     | 68 (14.3)  |
| Tumor staging, <i>n</i> (%)                 |            |
| Very early (0)                              | 29 (6.1)   |
| Early (A)                                   | 182 (38.2) |
| Intermediate (B)                            | 90 (18.9)  |
| Advanced (C)                                | 144 (30.3) |
| Terminal (D)                                | 31 (6.5)   |
| Surgical resection <i>n</i> (%)             |            |
| No                                          | 254 (53.4) |
| Yes                                         | 222 (46.6) |
| Distant metastasis <i>n</i> (%)             |            |
| No                                          | 429 (90.1) |
| Yes                                         | 47 (9.9)   |
| Vascular invasion <sup>a</sup> <i>n</i> (%) |            |
| No                                          | 387 (81.3) |
| Yes                                         | 89 (18.7)  |
| Lymph node metastasis <i>n</i> (%)          |            |
| No                                          | 384 (80.7) |
| Yes                                         | 92 (19.3)  |
| AFP <i>n</i> (%)                            |            |
| > 200 ng/ml                                 | 205 (43.1) |
| ≤ 200 ng/ml                                 | 271 (56.9) |
| Liver cirrhosis <i>n</i> (%)                |            |
| Absent                                      | 155 (32.6) |
| Present                                     | 321 (67.4) |

<sup>a</sup>Portal vein or Hepaticvein invasion according to radiology.

**Supplementary Table 5: Overall survival according to clinicopathologic features of resected HCC**

| Characteristics        | Patients, <i>n</i> | Deaths, <i>n</i> | MST (Mo) | 95% CI (Mo) | <i>P</i> value |
|------------------------|--------------------|------------------|----------|-------------|----------------|
| Age, years             |                    |                  |          |             | 0.243          |
| ≤ 55                   | 118                | 33               | 50       | 45.8–54.1   |                |
| > 55                   | 104                | 19               | 52*      | 48.9–56.2   |                |
| Gender                 |                    |                  |          |             | 0.628          |
| Male                   | 161                | 38               | 53       | 46.9–59.1   |                |
| Female                 | 61                 | 14               | 49*      | 45.9–51.8   |                |
| Smoking                |                    |                  |          |             | 0.751          |
| Yes                    | 116                | 29               | 50*      | 47.0–53.7   |                |
| No                     | 106                | 23               | 53       | 44.8–61.2   |                |
| Drinking               |                    |                  |          |             | 0.195          |
| Yes                    | 64                 | 19               | 55       | 35.2–74.7   |                |
| No                     | 158                | 33               | 53       | 47.6–58.3   |                |
| HBsAg                  |                    |                  |          |             | 0.762          |
| Positive               | 167                | 38               | 55       | †           |                |
| Negative               | 55                 | 14               | 53       | 45.8–60.2   |                |
| AFP level (ng/mL)      |                    |                  |          |             | 0.854          |
| ≤ 200                  | 137                | 33               | 55       | 46.8–63.1   |                |
| > 200                  | 85                 | 19               | 49       | †           |                |
| Child-Pugh Class       |                    |                  |          |             | NA             |
| CH/A                   | 222                | 52               | 53       | 46.6–59.3   |                |
| B/C                    | 0                  | 0                | ♂        | †           |                |
| Tumor size (cm)        |                    |                  |          |             | 0.001          |
| ≤ 5                    | 203                | 44               | 55       | †           |                |
| > 5                    | 19                 | 8                | 36       | 25.1–46.8   |                |
| Tumor type             |                    |                  |          |             | < 0.001        |
| Single                 | 189                | 35               | 55       | †           |                |
| Multiple               | 33                 | 17               | 39       | 34.4–43.5   |                |
| Portal vein invasion   |                    |                  |          |             | 0.011          |
| Yes                    | 4                  | 2                | 36       | 1.5–70.4    |                |
| No                     | 218                | 50               | 53       | 46.6–59.3   |                |
| Tumor BCLC staging     |                    |                  |          |             | < 0.001        |
| 0 and A                | 185                | 34               | 55       | †           |                |
| B to C                 | 37                 | 18               | 39       | 35.1–42.8   |                |
| Tumor TNM staging      |                    |                  |          |             | < 0.001        |
| I or II                | 210                | 45               | 55       | 47.2–62.7   |                |
| III or IV              | 12                 | 7                | 28       | 18.1–37.8   |                |
| Distant metastasis     |                    |                  |          |             | NA             |
| Yes                    | 0                  | 0                | ♂        | †           |                |
| No                     | 222                | 52               | 53       | 46.6–59.3   |                |
| Edmondson grade        |                    |                  |          |             | 0.037          |
| I or II                | 174                | 38               | 53       | †           |                |
| III or IV              | 48                 | 14               | 45*      | 40.9–49.8   |                |
| Microvascular invasion |                    |                  |          |             | < 0.001        |
| Present                | 24                 | 11               | 35       | 26.7–43.3   |                |
| Absent                 | 198                | 41               | 55       | 47.1–62.8   |                |
| Microsatellite nodule  |                    |                  |          |             | 0.017          |
| Present                | 31                 | 11               | 40*      | 37.0–44.8   |                |
| Absent                 | 191                | 41               | 53       | 46.6–59.3   |                |
| Background cirrhosis   |                    |                  |          |             | 0.851          |
| Present                | 157                | 34               | 49       | 43.7–54.3   |                |
| Absent                 | 65                 | 18               | 55       | †           |                |
| Lymph node metastasis  |                    |                  |          |             | < 0.001        |
| Present                | 5                  | 2                | 28       | †           |                |
| Absent                 | 217                | 50               | 53       | 46.6–59.3   |                |

HCC, hepatocellular carcinoma; MST, median survival time; Mo, months; AFP, alpha-fetoprotein; NA, not applicable.

\*Mean survival time was provided when MST could not be calculated.

†95% CI could not be calculated.

♂Both Mean survival time and MST could not be calculated.
